# Supplementary material for: Uniform dispersion of ultrafine ruthenium nanoparticles on nano-cube ceria as efficient catalysts for hydrogen production from ammonia-borane hydrolysis
Source: Royal Society of Chemistry journal article supplement (doi:10.1039/d2se01542k), 2022-12-28
Supplement: d2se01542k1.pdf [file d2se01542k1.pdf]

## Electronic Supplementary Information

### **Uniform dispersion of ultrafine ruthenium nanoparticles on nano-cube ceria as efficient catalysts for hydrogen production from ammonia-borane hydrolysis**

Zhiwei Peng, Yuhuan Wang, Chengwang Yin, Shujun Qiu\*, Yongpeng Xia, Yongjin  
Zou, Fen Xu, Lixian Sun\*, Hailiang Chu\*

*Guangxi Key Laboratory of Information Materials, Guangxi Collaborative Innovation  
Center of Structure and Property for New Energy and Materials and School of  
Materials Science and Engineering, Guilin University of Electronic Technology,  
Guilin, 541004, China*

*\* Authors for correspondence*

*E-mail: qiushujun@guet.edu.cn (S. Qiu);*

*sunlx@guet.edu.cn (L. Sun);*

*chuhailiang@guet.edu.cn (H. Chu)*

Tel.: +86-773-2216607

Fax: +86-773-2290129

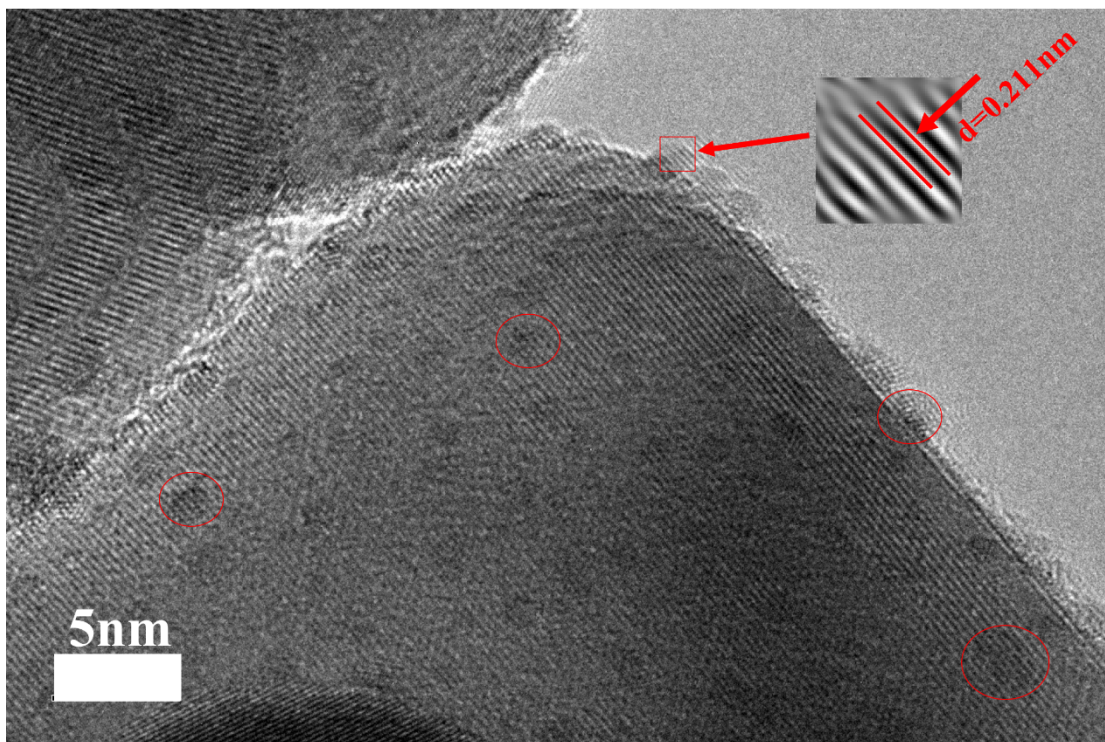

**Figure S1.** TEM images of Ru<sub>1</sub>/CeO<sub>2</sub>-180.

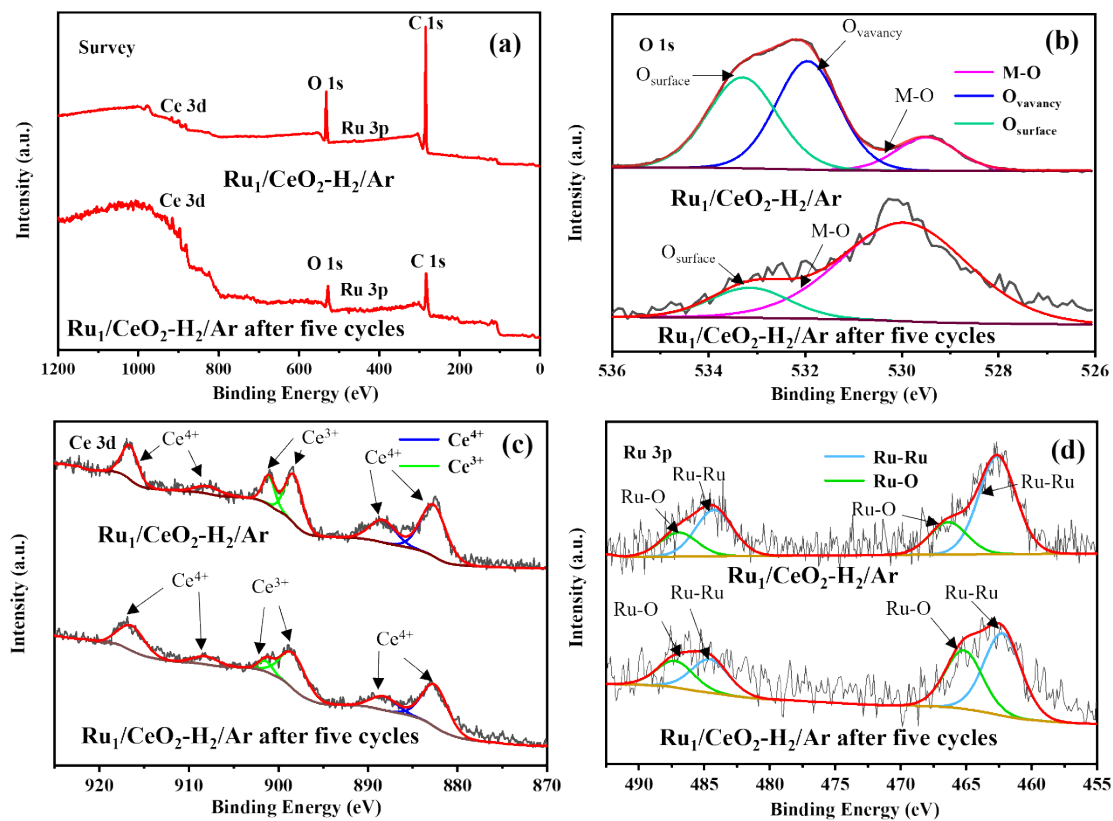

**Figure S2.** (a) XPS full spectrum and high-resolution XPS data of (b) O 1s, (c) Ce 3d, and (d) Ru 3p of the cycled  $\text{Ru}_1/\text{CeO}_2\text{-H}_2/\text{Ar}$  catalyst after five runs. For comparison, XPS results of the fresh sample is shown in this figure.
